# Supplementary material for: Active-targeted pH-responsive albumin–photosensitizer conjugate nanoparticles as theranostic agents
Source: Royal Society of Chemistry journal article supplement (doi:10.1039/c5tb01719j), 2015-01-01

## Supporting information

Active-targeted pH-responsive albumin–photosensitizer conjugate nanoparticles as theranostic agent

Gantumur Battogtokh, Young Tag Ko\*

College of Pharmacy, Gachon University, Incheon 406-799, South Korea

\*Corresponding author:

College of Pharmacy, Gachon University,

191 Hambakmoe-ro, Yeonsu-gu, Incheon 406-799, South Korea

Tel.: 82-32-899-6417; Fax: 82-32-820-4829

*E-mail address:* [youngtakko@gachon.ac.kr](mailto:youngtakko@gachon.ac.kr)

**Figure S1.** Proton NMR spectra of PheoA-EDA and cisaconityl-PheoA.

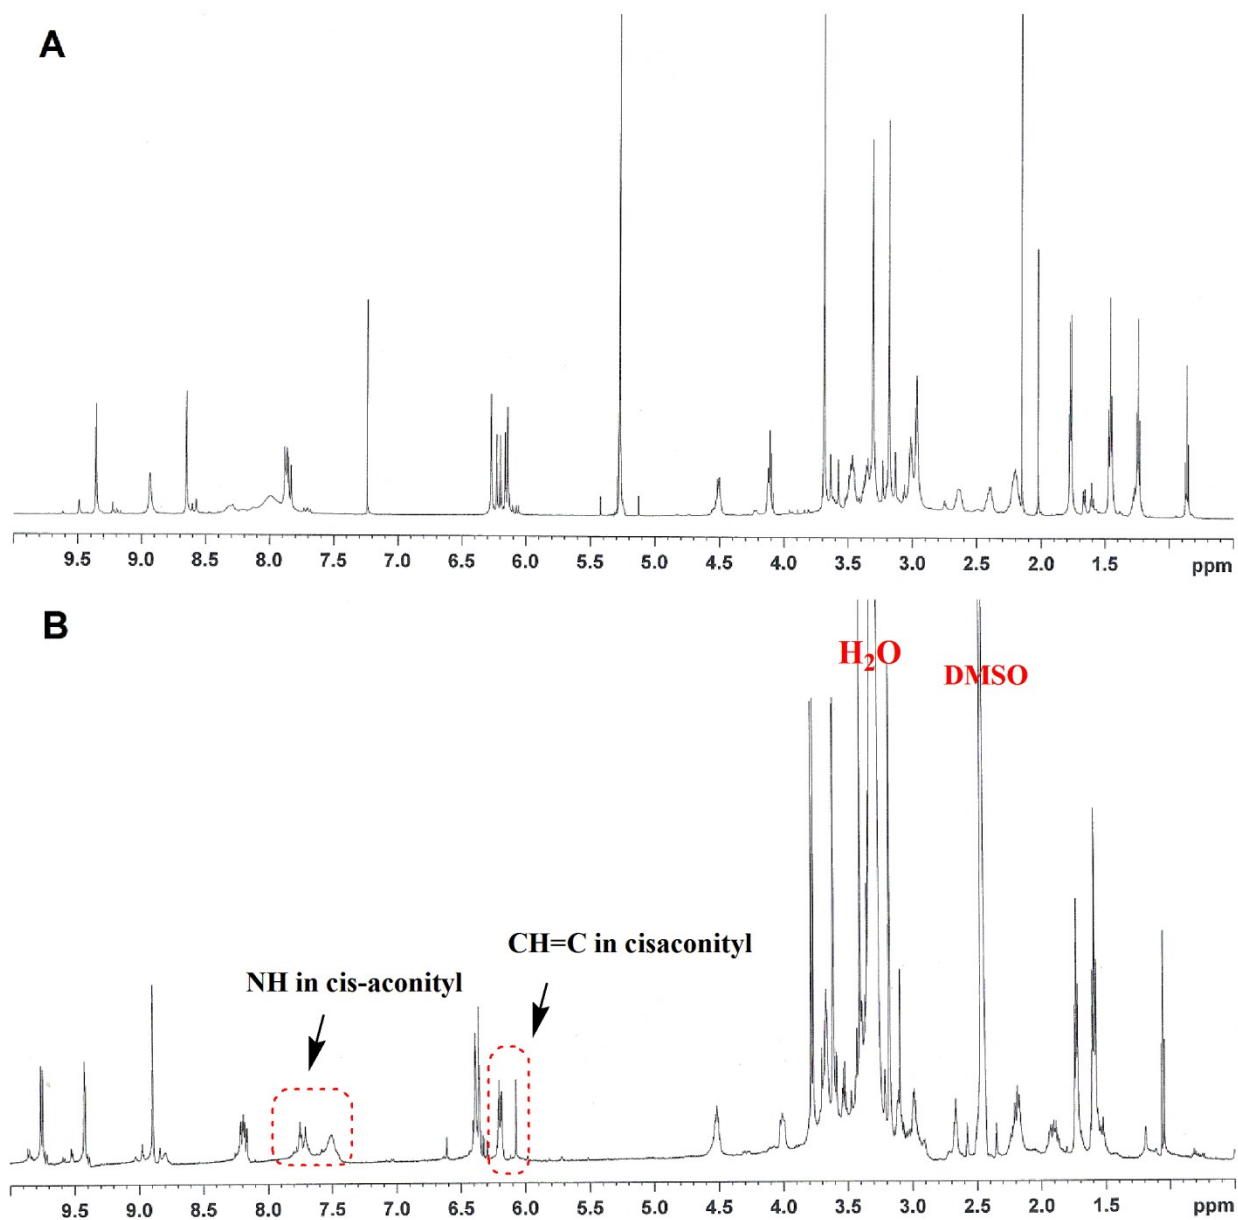

**Figure S2.** Calibration curve for fluorescence of PheoA in 1% Tween80/PBS at ex. 405 nm and em. 600-700 nm.

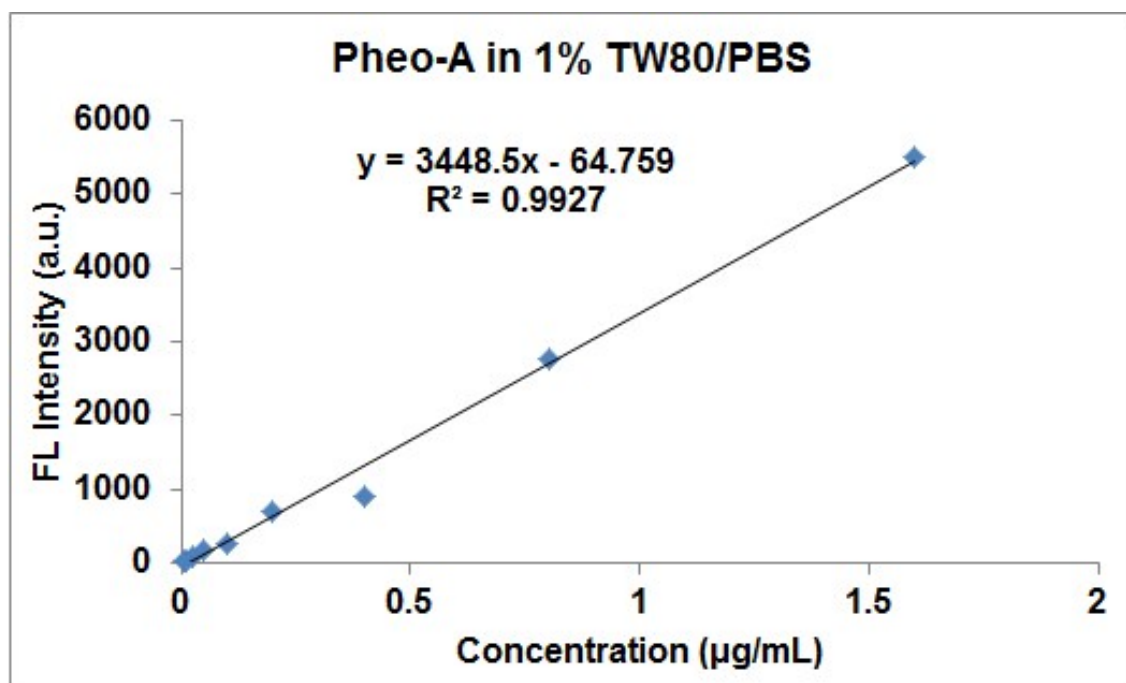

Supplement: c5tb01719j1.pdf [file c5tb01719j1.pdf]
